# Supplementary material for: Blood Plasma’s Protective Ability against the Degradation of S-Nitrosoglutathione under the Influence of Air-Pollution-Derived Metal Ions in Patients with Exacerbation of Heart Failure and Coronary Artery Disease
Source: MDPI journal article supplement (doi:10.3390/ijms221910500), 2021-09-28
Supplement: s1 [file s1]

# Blood plasma protective ability against the degradation of S-nitrosoglutathione under the influence of air pollution-derived metal ions in patients with exacerbation of heart failure and coronary artery disease

Anna Wądołek <sup>1</sup>, Dominika Drwiła <sup>2</sup>, Maria Oszajca <sup>1</sup>, Grażyna Stochel <sup>1</sup>, Ewa Konduracka <sup>3,\*</sup> and Małgorzata Brindell <sup>1,\*</sup>

<sup>1</sup> Faculty of Chemistry, Jagiellonian University in Kraków, Gronostajowa 2, 30-387 Krakow, Poland [anna.wadolek@doctoral.uj.edu.pl](mailto:anna.wadolek@doctoral.uj.edu.pl) (A.W.), [stochel@chemia.uj.edu.pl](mailto:stochel@chemia.uj.edu.pl) (G.S.)

<sup>2</sup> Department of Coronary Disease and Heart Failure, John Paul II Hospital, Krakow, Poland [dominika.drwila@gmail.com](mailto:dominika.drwila@gmail.com) (D.D)

<sup>3</sup> Jagiellonian University Medical College, Department of Coronary Disease and Heart Failure, John Paul II Hospital, Krakow, Poland

\* Correspondence: [maria.oszajca@uj.edu.pl](mailto:maria.oszajca@uj.edu.pl) (M.O.); [ewa.konduracka@uj.edu.pl](mailto:ewa.konduracka@uj.edu.pl) (E.K.); [malgorzata.brindell@uj.edu.pl](mailto:malgorzata.brindell@uj.edu.pl) (M.B)

Table S1. ICP-OES analysis of the SRM 1648a extract solution in Tris buffer 0.1 M, pH = 7.4 (data taken from ChemSusChem 2019, 12, 661 – 671, <http://doi.org/10.1002/cssc.v12.3>.)

| Element | mg · L <sup>-1</sup> |
|---------|----------------------|
| Fe      | 4.10                 |
| Sb      | 2.56                 |
| Zn      | 2.46                 |
| Cu      | 0.98                 |
| Ti      | 0.92                 |
| Mn      | 0.69                 |
| Mo      | 0.44                 |
| Sn      | 0.44                 |
| Hg      | 0.35                 |
| Ni      | 0.20                 |
| Cd      | 0.07                 |
| Cr      | 0.06                 |
